# Supplementary material for: Fishing Industry Perspectives on Sea-Level Rise Risk and Adaptation
Source: MDPI journal article supplement (doi:10.3390/w13081124), 2021-04-20
Supplement: s1 [file s1]

# Florida Fishing Communities & SLR Survey

---

Start of Block: Background Questions

## Q86 BACKGROUND QUESTIONS

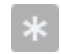

Q6 Date

---

---

Q1 Interview Number

---

---

Q7 Industries

- ☐ Commercial Fishing (1)
- ☐ For-hire Fishing (2)
- ☐ Seafood Wholesaler (3)
- ☐ Fishing Gear/Bait Sales (4)
- ☐ Boat Rentals (5)
- ☐ Other (6) \_\_\_\_\_

---

Q2 Gender

☐ Male (1)

☐ Female (2)

---

Q3 Age

---

---

Q4 Race/Ethnicity

☐ White (1)

☐ Black or African American (2)

☐ American Indian or Alaska Native (3)

☐ Asian (4)

☐ Native Hawaiian or Pacific Islander (5)

☐ Other (6) \_\_\_\_\_

---

Q5 Home Zip Code

---

End of Block: Background Questions

---

Start of Block: Community Questions

## Q87 COMMUNITY QUESTIONS

---

Q8 How long have you lived in your community? Where are you from?

---

Q10 How long have you been in your industry?

---

Q11

Do you work full-time or part-time?

☐ Full-time (1)

☐ Part-time (2)

---

*Display This Question:*

*If Do you work full-time or part-time? = Part-time*

Q98 What other occupations do you have?

---

Q13 Do you travel to different areas for work during the year?

---

---

Q12 What percentage of your household income is derived from each industry?

Commercial Fishing : \_\_\_\_\_ (1)

For-hire Fishing : \_\_\_\_\_ (2)

Seafood Wholesale : \_\_\_\_\_ (3)

Fishing gear/bait sales : \_\_\_\_\_ (4)

Boat Rentals : \_\_\_\_\_ (5)

Other : \_\_\_\_\_ (6)

Total : \_\_\_\_\_

---

Q14 Do you belong to any recreational fishing organizations?

☐ CCA of Florida (1)

☐ Florida Sportsman (2)

☐ OFF (3)

☐ Clam/aquaculture associations (4)

☐ Chambers of commerce (5)

☐ Other (6) \_\_\_\_\_

---

Q99 Do you belong to any conservation organizations?

\_\_\_\_\_

---

Q133

Is your family involved in the fishing industry as well?

---

Q135

How would you rank the following issues/factors in terms of how they may affect your fishing operation (1-5, where 1 is high impact and 5 is no impact)

|                                                           |                                                                                      |
|-----------------------------------------------------------|--------------------------------------------------------------------------------------|
| Level of non-waterfront development (1)                   |    |
| Competition within your community (2)                     |    |
| Competition from within the US (3)                        |    |
| Competition from imports of the species you fish/sell (4) |    |
| Changes in rent prices for fishing operations (5)         |   |
| Fishing regulations (6)                                   |  |
| Climate change (7)                                        |  |
| Pollution (8)                                             |  |
| Overfishing (9)                                           |  |
| Sea level rise (10)                                       |  |

End of Block: Community Questions

Start of Block: Seafood Wholesaler

Q89 SEAFOOD WHOLESALER QUESTIONS

---

Q44 How many years have you bought and sold seafood products on a commercial scale?

---

Q50 Which species did you buy and sell last season?

---

Q52 How many pounds of each species did you purchase from local fishermen last season?

---

Q51 Have the species groups you've bought and sold changed over time?

☐ No (1)

☐ Yes (2)

*Display This Question:*

*If Have the species groups you've bought and sold changed over time? = Yes*

Q95 How?

---

Q47 Where do you buy your fish to sell?

---

Q48 Where do you sell your seafood products?

---

Q49 Do you sell bait?

☐ Yes (1) \_\_\_\_\_

☐ No (2) \_\_\_\_\_

Q156 In your experience in the seafood industry, what changes or trends have you seen over time?

---

Q83 If current trends remained the same, would your operation and community remain as is for the next 5 years?

☐ No (1) \_\_\_\_\_

☐ Yes (2) \_\_\_\_\_

Q100 If current trends remained the same, would your operation and community remain as is for the next 10 years?

☐ No (1) \_\_\_\_\_

☐ Yes (2) \_\_\_\_\_

Q138 If current trends remained the same, would your operation and community remain as is for the next 15 years?

☐ No (1) \_\_\_\_\_

☐ Yes (2) \_\_\_\_\_

---

Q157 If current trends remained the same, what will the future of the seafood industry look like in your community?

\_\_\_\_\_

---

Q143 Over the past 10 years, how has your business income changed? Is it the same, up X%, or down X% and why?

\_\_\_\_\_

---

Q150 What are the top three threats to your business?

\_\_\_\_\_

---

Q146 In what scenario would your business no longer be sustainable?

\_\_\_\_\_

End of Block: Seafood Wholesaler

---

Start of Block: For-hire Fishing Questions

Q90 FOR-HIRE FISHING QUESTIONS



Q15

How many fishing trips do you take per month?

☐ Winter (1) \_\_\_\_\_

☐ Summer (2) \_\_\_\_\_

☐ Other (3) \_\_\_\_\_

---

Q22 Do you offer other activities besides fishing on your vessel?

\_\_\_\_\_

---

Q62 Which environments do you target when fishing?

☐ Off-shore (1) \_\_\_\_\_

☐ Near-shore (2) \_\_\_\_\_

☐ Reef (3) \_\_\_\_\_

☐ Other (4) \_\_\_\_\_

---

Q16 What percentage of your trips are to each environment?

☐ Off-shore (1) \_\_\_\_\_

☐ Near-shore (2) \_\_\_\_\_

☐ Reef (3) \_\_\_\_\_

☐ Other (4) \_\_\_\_\_

---

Q109 What are the top 3 species that you target?

\_\_\_\_\_

---

Q27 Do you compete in fishing tournaments?

\_\_\_\_\_

---

Q28 How many people are employed in your operations?

\_\_\_\_\_

---

Q123 Is the crew paid on a fixed fee or a shared system?

☐ Fixed Fee (1)

☐ Shared System (2)

☐ Other (3) \_\_\_\_\_

---

Q30 How many clients come on an average trip?

\_\_\_\_\_

---

Q31 What percentage of your catch do you keep?

\_\_\_\_\_

---

Q32 What percentage of your catch do you sell?

\_\_\_\_\_

---

Q33 What percentage of your customers are out of state tourists? Has that changed over time?

\_\_\_\_\_

---

Q151 In your experience in the charter fishing industry, what changes or trends have you seen over time?

\_\_\_\_\_

---

Q102 If current trends remained the same, would your operation and community remain as is for the next 5 years?

☐ No (1) \_\_\_\_\_

☐ Yes (2) \_\_\_\_\_

---

Q104 If current trends remained the same, would your operation and community remain as is for the next 10 years?

☐ No (1) \_\_\_\_\_

☐ Yes (2) \_\_\_\_\_

---

Q139 If current trends remained the same, would your operation and community remain as is for the next 15 years?

☐ No (1) \_\_\_\_\_

☐ Yes (2) \_\_\_\_\_

---

Q152 If current trends remained the same, what will the future of charter fishing look like in your community?

\_\_\_\_\_

---

Q144 Over the past 10 years, how has your business income changed? Is it the same, up X%, or down X% and why?

\_\_\_\_\_

---

Q153 What are the top three threats to your business?

\_\_\_\_\_

---

Q147 In what scenario would your business no longer be sustainable?

\_\_\_\_\_

End of Block: For-hire Fishing Questions

---

Start of Block: Economic Questions (For Hire)

Q91 ECONOMIC QUESTIONS (for-hire fishing)

---

Q53 How many vessels are used in your operations?

---

---

---

---

---

Q129 Has the number of vessels you own changed over time? How?

---

Q56 What is the total replacement value of all of your vessels w/ tech?

---

Q57 What kinds of fishing gear do you use?

☐ Stone Crab Traps (1) \_\_\_\_\_

☐ Lobster Traps (2) \_\_\_\_\_

☐ Nets (3) \_\_\_\_\_

☐ Scuba gear (4) \_\_\_\_\_

☐ Hook & Line (5) \_\_\_\_\_

☐ Other (6) \_\_\_\_\_

---

Q59 How many traps did you use last season?

☐ Lobster Traps (1) \_\_\_\_\_

☐ Crab Traps (2) \_\_\_\_\_

---

Q60 How many nets did you use last season?

☐ Lampara Nets (1) \_\_\_\_\_

☐ Butterfly Nets (2) \_\_\_\_\_

☐ Pound nets (3) \_\_\_\_\_

☐ Other (4) \_\_\_\_\_

---

Q128 What is the total value of the gear that you use?

\_\_\_\_\_

---

Q127 Has the gear that you use changed over time in amount or type? Why?

\_\_\_\_\_

---

Q61 What kind of bait do you use and where do you obtain it?

☐ Fish for Bait (1) \_\_\_\_\_

☐ Purchase Bait (2) \_\_\_\_\_

---

Q65 What percentage of each species group did you land last year?

☐ Pelagics (1) \_\_\_\_\_

☐ Coastal Species (2) \_\_\_\_\_

☐ Reef Fish (3) \_\_\_\_\_

☐ Mollusks (4) \_\_\_\_\_

☐ Shrimp (5) \_\_\_\_\_

☐ Lobster (6) \_\_\_\_\_

☐ Other (7) \_\_\_\_\_

-----



Q66 On a typical day on the water how much do you spend on...

☐ Fuel (1) \_\_\_\_\_

☐ Ice (2) \_\_\_\_\_

☐ Bait (3) \_\_\_\_\_

☐ Food (4) \_\_\_\_\_

☐ Supplies (5) \_\_\_\_\_

☐ Crew (6) \_\_\_\_\_

☐ Other (7) \_\_\_\_\_

---

Q154 SLR Questions (depth, salinity, current areas, historical areas)

End of Block: Economic Questions (For Hire)

---

Start of Block: Commercial Fishing Questions

Q92 COMMERCIAL FISHING QUESTIONS

---

Q64 Which species does your operation target?

☐ Pelagics (1) \_\_\_\_\_

☐ Coastal Species (2) \_\_\_\_\_

☐ Reef Fish (3) \_\_\_\_\_

☐ Lobsters (4) \_\_\_\_\_

☐ Mollusks (5) \_\_\_\_\_

☐ Shrimp (6) \_\_\_\_\_

☐ Other (7) \_\_\_\_\_

-----

Q110 How many fishing trips do you take per month for each species?

☐ Pelagics (1) \_\_\_\_\_

☐ Coastal Species (2) \_\_\_\_\_

☐ Reef Fish (3) \_\_\_\_\_

☐ Lobsters (4) \_\_\_\_\_

☐ Mollusks (5) \_\_\_\_\_

☐ Shrimp (6) \_\_\_\_\_

☐ Other (7) \_\_\_\_\_

-----

Q112 How long is an average fishing trip in days?

☐ Pelagics (1) \_\_\_\_\_

☐ Coastal Species (2) \_\_\_\_\_

☐ Reef Fish (3) \_\_\_\_\_

☐ Lobsters (4) \_\_\_\_\_

☐ Mollusks (5) \_\_\_\_\_

☐ Shrimp (6) \_\_\_\_\_

☐ Other (7) \_\_\_\_\_

---

Q39 How many people are employed in your operations?

\_\_\_\_\_

---

Q40 Is the crew paid on a fixed fee or a shared system?

\_\_\_\_\_

---

Q41 Where do you sell your catch?

\_\_\_\_\_

Q42 What were your sales last year?

---

Q155 In your experience in the commercial fishing industry, what changes or trends have you seen over time?

---

Q118 If current trends remained the same, would your operation remain as is for the next 5 years?

☐ No (1) \_\_\_\_\_

☐ Yes (2) \_\_\_\_\_

Q119 If current trends remained the same, would your operation remain as is for the next 10 years?

☐ No (1) \_\_\_\_\_

☐ Yes (2) \_\_\_\_\_

Q140 If current trends remained the same, would your operation remain as is for the next 15 years?

☐ No (1) \_\_\_\_\_

☐ Yes (2) \_\_\_\_\_

Q158 If current trends remain the same, what will be the future of commercial fishing in your community?

---

Q145 Over the past 10 years, how has your business income changed? Is it the same, up X%, or down X% and why?

---

Q159 What are the top three threats to your business?

---

Q149 In what scenario would your business no longer be sustainable?

---

End of Block: Commercial Fishing Questions

Start of Block: Economic Questions (Commercial)

Q93 ECONOMIC QUESTIONS (Commercial Fishing)

Q85 How many vessels are used in your operations?

---

---

---

---

---

---

Q130 Has the number of vessels you own changed over time? How?

---

---

Q88 What is the total value of your vessels?

---

---

Q89 What kinds of fishing gear do you use?

☐ Stone Crab Traps (1) \_\_\_\_\_

☐ Lobster Traps (2) \_\_\_\_\_

☐ Nets (3) \_\_\_\_\_

☐ Scuba gear (4) \_\_\_\_\_

☐ Hook & Line (5) \_\_\_\_\_

☐ Other (6) \_\_\_\_\_

---

Q124 What is the value of the gear that you use?

---

---

Q125 Has the gear that you use changed over time in amount or type? Why?

\_\_\_\_\_

Q91 How many traps did you use last season?

☐ Lobster Traps (1) \_\_\_\_\_

☐ Crab Traps (2) \_\_\_\_\_

Q92 How many nets did you use last season?

☐ Lampara Nets (1) \_\_\_\_\_

☐ Butterfly Nets (2) \_\_\_\_\_

☐ Pound nets (3) \_\_\_\_\_

☐ Other (4) \_\_\_\_\_

Q93 What kind of bait do you use and where do you obtain it?

☐ Fish for Bait (1) \_\_\_\_\_

☐ Purchase Bait (2) \_\_\_\_\_



Q95 On a typical day on the water how much do you spend on...

☐ Fuel (1) \_\_\_\_\_

☐ Ice (2) \_\_\_\_\_

☐ Bait (3) \_\_\_\_\_

☐ Food (4) \_\_\_\_\_

☐ Supplies (5) \_\_\_\_\_

☐ Other (6) \_\_\_\_\_

---

Q160 SLR questions (depth, salinity, current areas, historical areas)

End of Block: Economic Questions (Commercial)

---

Start of Block: Environmental Questions

Q94 ENVIRONMENTAL QUESTIONS

---

Q131 Have you noticed any changes in fishery abundance?

☐ Yes, abundance has INCREASED (1) \_\_\_\_\_

☐ Yes, abundance has DECREASED (2) \_\_\_\_\_

☐ No, I have not noticed any changes (3)  
\_\_\_\_\_

☐ I don't know (4)

☐ Other (5) \_\_\_\_\_

---

*Display This Question:*

*If Have you noticed any changes in fishery abundance? = Yes, abundance has INCREASED*

*And Have you noticed any changes in fishery abundance? = Yes, abundance has DECREASED*

Q132 What do you think is the cause for this change?

\_\_\_\_\_

---

Q105 Do you encounter any of the following Species of Greatest Conservation Need?

☐ Sea Turtles (1)

☐ Sharks (2)

☐ Johnson's seagrass (3)

☐ Coral (4)

☐ Manatees (5)

☐ American Crocodile (6)

☐ Smalltooth Sawfish (7)

☐ Groupers (8)

☐ Eagle Rays (9)

---

Q106 Where have you encountered these species? (REFER TO MAP)

---

Q108 Have you noticed any changes in Species abundance?

☐ Sea Turtles (1) \_\_\_\_\_

☐ Sharks (2) \_\_\_\_\_

☐ Johnson's seagrass (3) \_\_\_\_\_

☐ Coral (4) \_\_\_\_\_

☐ Manatees (5) \_\_\_\_\_

☐ American Crocodile (6) \_\_\_\_\_

☐ Smalltooth Sawfish (7) \_\_\_\_\_

☐ Groupers (8) \_\_\_\_\_

☐ Eagle Rays (9) \_\_\_\_\_

---

Q76 What species are the most common bycatch?

\_\_\_\_\_

---

Q67 Based on your experience fishing, have you seen any large environmental changes in the areas that you fish in over time?

\_\_\_\_\_

Q68 Have you ever had experience rebuilding after a Hurricane? What happened?

---

Q72 Have you experience a red tide event? How did this effect your operations?

---

Q69 Have you noticed any significant changes in the populations of species that you target over time?

---

Q81 Do you know of any charter fishermen, commercial fishermen, seafood wholesalers, or anyone else in the fishing industry that would be willing to speak to us?

---

End of Block: Environmental Questions

Start of Block: Hurricane Questions

Q161 Did you stay for Hurricane Irma or did you evacuate?

☐ Stay (1)

☐ Evacuate (2)

☐ Other (3) \_\_\_\_\_

Q162 Did you experience flooding, and if so how much?

☐ No (1)

☐ Yes (2) \_\_\_\_\_

---

Q163 Did your area lose power? If so, for how long?

☐ No (1)

☐ Yes (2) \_\_\_\_\_

☐ I don't know (3)

---

Q164 How did Hurricane Irma compare to other storms that you've experienced in your area?

☐ It was stronger than past storms that I've experienced (1)

\_\_\_\_\_

☐ It was weaker than past storms that I've experienced (2)

\_\_\_\_\_

☐ I don't know (3) \_\_\_\_\_

---

*Display This Question:*

*If Were there any physical damages to your business or your vessel? = Yes*

Q165 How did you prepare your boats for the storm?

- ☐ I tied them up (1) \_\_\_\_\_
- ☐ I moved them (2) \_\_\_\_\_
- ☐ Other (3) \_\_\_\_\_
- 

Q166 How did you prepare your business?

- ☐ Shuttering windows (1) \_\_\_\_\_
- ☐ Storing gear (2) \_\_\_\_\_
- ☐ Other (3) \_\_\_\_\_
- 

Q167 Were there any physical damages to your business or your vessel?

- ☐ Yes (1)
- ☐ No (2)
- ☐ I don't know (3)
- 

*Display This Question:*

*If Were there any physical damages to your business or your vessel? = Yes*

Q168 What damage occurred to your vessel?

\_\_\_\_\_

---

*Display This Question:*

*If Were there any physical damages to your business or your vessel? = Yes*

Q169 What damage occurred to your structural property associated with fishing (if present)?

\_\_\_\_\_

---

Q170 Did any damage occur to your gear?

\_\_\_\_\_

---

Q171 Was there damage to your home?

☐ Flooding (1) \_\_\_\_\_

☐ Surge Damage (2) \_\_\_\_\_

☐ Wind Damage (3) \_\_\_\_\_

☐ Other (4) \_\_\_\_\_

---



Q172 Were there any non-physical damages from the storm?

- ☐ Yes, loss of tourism (1)
- ☐ Yes, loss of sea time (2)
- ☐ Yes, loss of markets being down (3)
- ☐ Yes, other (4) \_\_\_\_\_
- ☐ No (5) \_\_\_\_\_
- 

Q173 Has the fact that this hurricane season has been particularly strong caused you to change any of your future plans? (evacuating, reinforcing, building up, permanent departure)

\_\_\_\_\_

---

Q175 How would you rank climate change in terms of how it may affect your fishing operation (1-5, where 1 is high impact and 5 is no impact)?

- ☐ 1 - Climate Change is not real (1)
- ☐ 2 - I'm not sure what I think about climate change (2)
- ☐ 3 - Climate change might affect my business (3)
- ☐ 4. Climate change definitely affects my business (4)
- ☐ 5. Climate change is one of the largest threats to my livelihood (5)

End of Block: Hurricane Questions

---
